# Supplementary material
Source: PubMed Central journal article supplement (PMC5749657)
Supplement: koni-07-02-1393133-s001.pdf [file koni-07-02-1393133-s001.pdf]

|                             | <b>Prebiopic c.l.</b><br><i>P (r)</i> | <b>Presurgical c.l.</b><br><i>P (r)</i> |
|-----------------------------|---------------------------------------|-----------------------------------------|
| <b>CD3+ stroma</b>          | 0.443 (r=-0.245)                      | 0.654 (r=0.036)                         |
| <b>CD3+ epithel</b>         | 0.192 (r=-0.404)                      | 0.333 (r=-0.077)                        |
| <b>CD3+/MIB1+ stroma</b>    | 0.712 (r=0.119)                       | 0.628 (r=-0.039)                        |
| <b>CD3+/MIB1+ epithel</b>   | 0.263 (r=0.351)                       | 0.121 (r=-0.123)                        |
| <b>CD8+ stroma</b>          | 0.770 (r=-0.095)                      | 0.714 (r=-0.029)                        |
| <b>CD8+ epithel</b>         | 0.341 (r=-0.301)                      | 0.943 (r=-0.006)                        |
| <b>GrB+/CD8+ stroma</b>     | 0.897 (r=0.42)                        | 0.223 (r=-0.097)                        |
| <b>GrB+/CD8+ epithel</b>    | 0.587 (r=-0.175)                      | 0.686 (r=-0.032)                        |
| <b>GrB/CD8//CD8 stroma</b>  | 0.379 (r=0.280)                       | 0.113 (r=-0.126)                        |
| <b>GrB/CD8//CD8 epithel</b> | 0.844 (r=0.064)                       | 0.330 (r=-0.077)                        |

Abbreviations: c.l., circulating lymphocytes; r= regression coefficient
